# Supplementary material for: An electrochemiluminescence device for visualized detection of lead in practical samples
Source: Royal Society of Chemistry journal article supplement (doi:10.1039/d4ra05742b), 2024-01-01
Supplement: d4ra05742b1.pdf [file d4ra05742b1.pdf]

1 Array electrochemiluminescence device for sensitive and  
2 selective visualization of Lead in practical food samples

3

4 Huaanzi Hu <sup>a,1</sup>, Cheng Wang <sup>b,1</sup>, Chen Qian <sup>c,\*</sup>, Chengqi Li <sup>d</sup>, Yulin Li <sup>d</sup>, Jianbin Pan <sup>e</sup>,  
5 \*, Xinye Ni <sup>a, \*</sup>

6

7 <sup>a</sup> Second People's Hospital of Changzhou, Nanjing Medical University, Changzhou  
8 213164, P. R. China

9 <sup>b</sup> School of Pharmacy, Changzhou University, No. 21 Middle Gehu Road, Changzhou,  
10 213164, P. R. China

11 <sup>c</sup> Department of Orthopedics, Wujin Hospital Affiliated with Jiangsu University,  
12 Changzhou 213164, P. R. China

13 <sup>d</sup> State Key Laboratory of Radiation Medicine and Protection, School for Radiological  
14 and Interdisciplinary Sciences (RAD-X), Soochow University, Suzhou 215123, P.R.  
15 China

16 <sup>e</sup> State Key Laboratory of Analytical Chemistry for Life Science, School of Chemistry  
17 and Chemical Engineering, Nanjing University, Nanjing 210023, P. R. China

18

19 \* Corresponding authors: E-mails: qianchen88@126.com (C. Qian), jbpan@nju.edu.cn  
20 (J. Pan), nxy@njmu.edu.cn (X. Ni).

21

22 1 These authors contributed equally to this work.

23

24

25

26

27

28

29

30

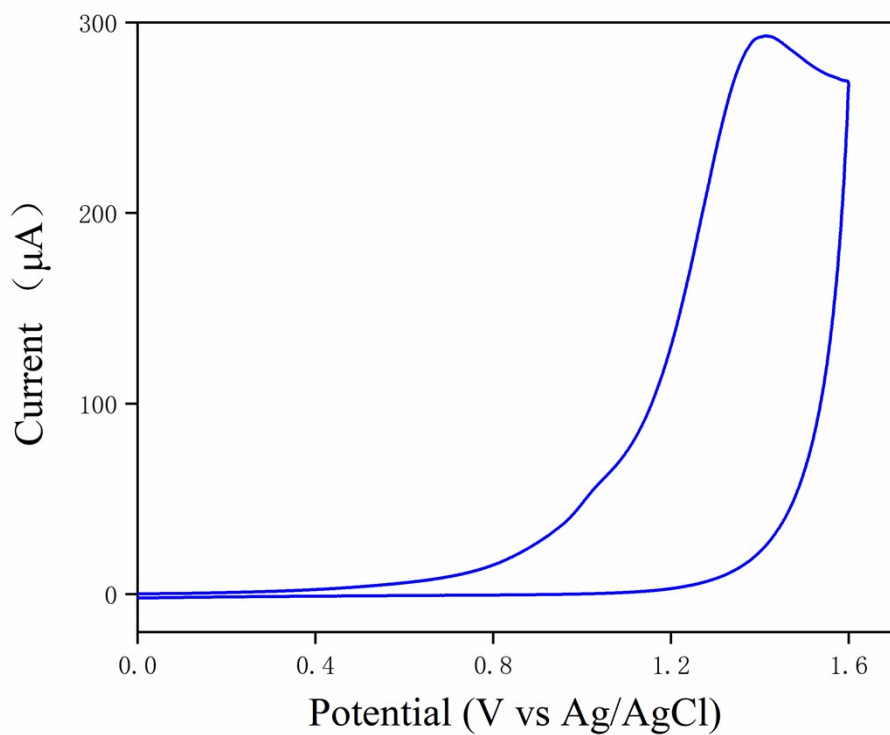

31

32 **Figure S1.** The CV data of ethylenediamine in 0.1 M PBS solution, pH = 7.4; scan rate = 100 mV  
 33 s<sup>-1</sup>.

34

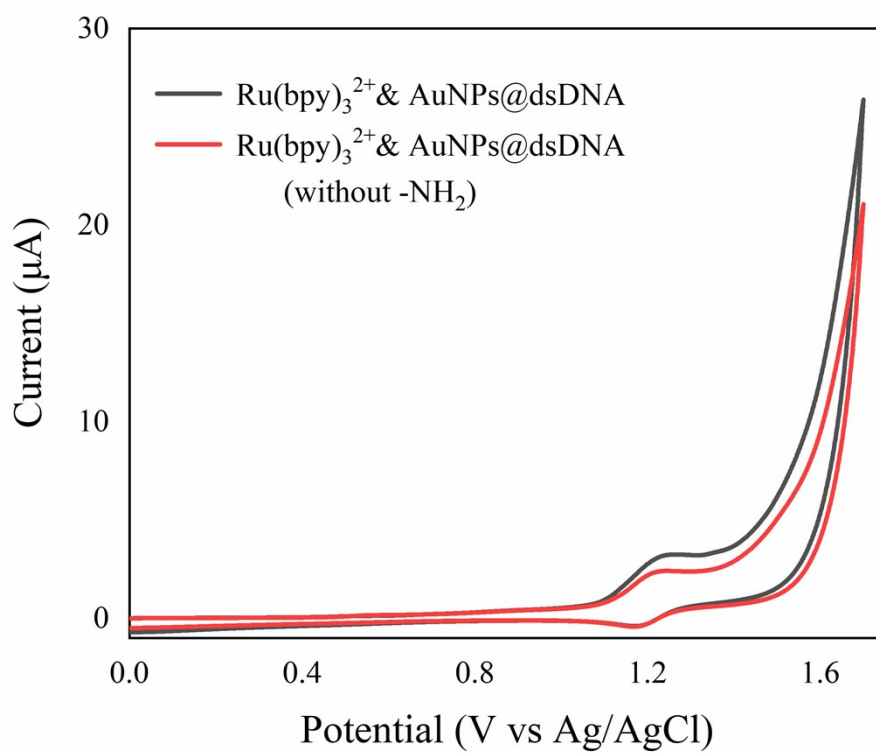

35

36 **Figure S2.** CV of AuNPs@dsDNA (AuNPs@ssDNA combined with NH<sub>2</sub>-ssDNA) and  
37 AuNPs@dsDNA without -NH<sub>2</sub> modified GCEs in 0.1 M PBS solution with 1 mM Ru(bpy)<sub>3</sub>Cl<sub>2</sub>, pH  
38 = 7.4. Scan rate = 100 mV s<sup>-1</sup>.

39

40

41

42

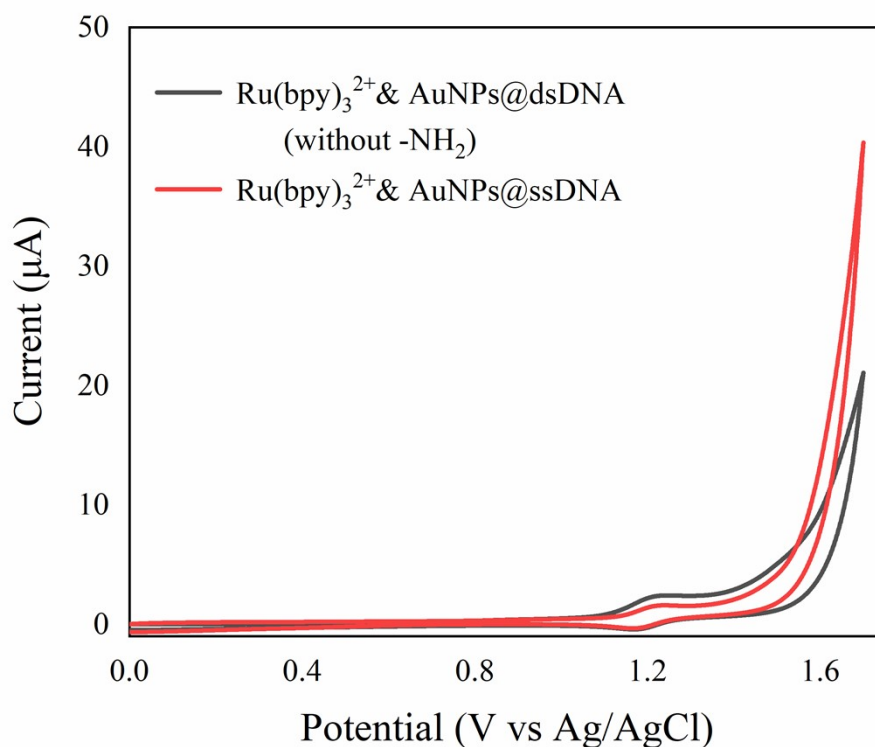

43

44 **Figure S3.** CV of AuNPs@ssDNA and AuNPs@dsDNA without -NH<sub>2</sub> modified GCEs in 0.1 M  
45 PBS solution with 1 mM Ru(bpy)<sub>3</sub>Cl<sub>2</sub>, pH = 7.4. Scan rate = 100 mV s<sup>-1</sup>.

46

47

48

49

50

51

52

53

54

55

56

57

58

59

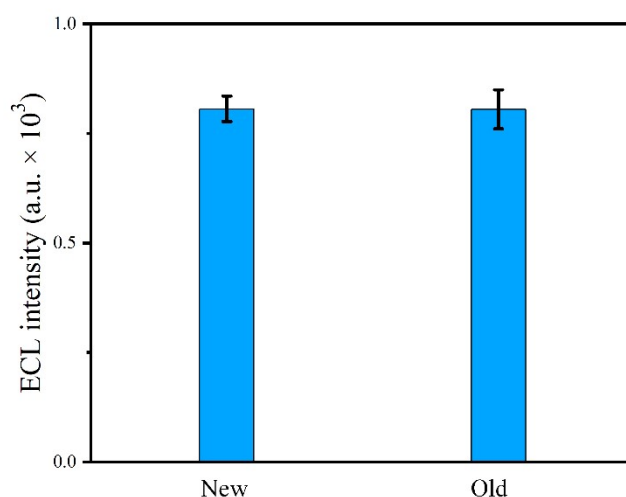

60  
 61 **Figure S4.** The ECL response of freshly prepared (New) or stored (Old, one month under  
 62 room temperature) to the same Pb<sup>2+</sup> sample (100 ng/L).  
 63  
 64

|                                                     | ECL                         | ICP-MS                     |
|-----------------------------------------------------|-----------------------------|----------------------------|
| <i>Glycyrrhiza uralensis</i><br>from Inner Mongolia | 22.6 ng/g<br>(R.S.D.:0.6%)  | 23.8 ng/g<br>(R.S.D.:2.5%) |
| Lake Water<br>from Dushu Lake                       | 0.279 ng/g<br>(R.S.D.:2.4%) | Out of LOD                 |

65  
 66 **Figure S5.** The summary of Pb<sup>2+</sup> concentration in other practical samples determined by  
 67 our device and ICP-MS.  
 68  
 69  
 70  
 71

72 **Table S1 The current detection methods for Pb<sup>2+</sup> and their LODs**

| Pb Probes                                                                       | LODs (µg/L)                |
|---------------------------------------------------------------------------------|----------------------------|
| C-PFBT Pdots/Fc-DNA/DNA enzyme/GCE <sup>1</sup>                                 | 3.522×10 <sup>-5</sup> (1) |
| Ru1-17E' 17DS/4-ABA/GE <sup>2</sup>                                             | 2.900×10 <sup>-4</sup> (2) |
| pDNA/MPNs/AuNPs/K <sub>2</sub> S <sub>2</sub> O <sub>8</sub> /GPWE <sup>3</sup> | 8.288×10 <sup>-4</sup> (3) |
| Fe <sub>3</sub> O <sub>4</sub> @Au-ssDNA&Ru-NH <sub>2</sub> /MGCE <sup>4</sup>  | 2.072×10 <sup>-2</sup> (4) |
| Au NPs electrode/CdS QDs/(Ag/ZnO) <sup>5</sup>                                  | 1.989×10 <sup>-4</sup> (5) |

|                                                                                                |                        |      |
|------------------------------------------------------------------------------------------------|------------------------|------|
| Pb <sup>2+</sup> /S2/S1/SLAg NP-PWE <sup>6</sup>                                               | 414.4                  | (6)  |
| GQD/L-Cys <sup>7</sup>                                                                         | 14.5                   | (7)  |
| P2-rGO-PdAu-GOx <sup>8</sup>                                                                   | 2.901×10 <sup>-2</sup> | (8)  |
| AuNPs@nano-C60/GCE <sup>9</sup>                                                                | 1.056×10 <sup>-4</sup> | (9)  |
| DPS/Ru-PAMAM-HIFAuNPs /GCE <sup>10</sup>                                                       | 8.288×10 <sup>-6</sup> | (10) |
| NH <sub>2</sub> -SiO <sub>2</sub> /Ru(bpy) <sub>3</sub> <sup>2+</sup> -UiO66/GCE <sup>11</sup> | 2.072×10 <sup>-5</sup> | (11) |
| GR-5 DNAzyme/Ru(phen) <sub>3</sub> <sup>2+</sup> /Au <sup>12</sup>                             | 1.865×10 <sup>-4</sup> | (12) |
| TCPP/MCH/DNAzyme/ZnO-Au NPs/GCE <sup>13</sup>                                                  | 2.486×10 <sup>-4</sup> | (13) |
| PTC-NH <sub>2</sub> /cDNA/MCH/Apt/AuNCs/GCE <sup>14</sup>                                      | 1.036×10 <sup>-5</sup> | (14) |
| CdTe/GO, graphene/AuNPs/ITO <sup>15</sup>                                                      | 7.874×10 <sup>-4</sup> | (15) |
| G-quadruplex/P-GO@QDs/GCE <sup>16</sup>                                                        | 1.865×10 <sup>-6</sup> | (16) |
| MXene@Au/Ru(bpy) <sub>3</sub> <sup>2+</sup> /GCE <sup>17</sup>                                 | 2.590×10 <sup>-5</sup> | (17) |
| g-C <sub>3</sub> N <sub>4</sub> QDs@NPG-S3/ITO <sup>18</sup>                                   | 4.144×10 <sup>-3</sup> | (18) |
| Ru@AuNPs/Si@CNCs-DNA /NaIO <sub>4</sub> <sup>19</sup>                                          | 2.072×10 <sup>-3</sup> | (19) |
| RhB/dsDNA/Pdots/GCE <sup>20</sup>                                                              | 7.873×10 <sup>-3</sup> | (20) |
| DNAapt/MCH/cDNA/CNNFs/PCNTs-AuNPs/GCE <sup>21</sup>                                            | 8.288×10 <sup>-6</sup> | (21) |
| DNAzyme/TBR-NHS/Au <sup>22</sup>                                                               | 2.279×10 <sup>-3</sup> | (22) |
| DNA/2D BP/Ag/AgCl/GCE <sup>23</sup>                                                            | 5.657×10 <sup>-3</sup> | (23) |
| 4-CNox/DNAzyme/T30695/MoS <sub>2</sub> -CdSe@CdS/GCE <sup>24</sup>                             | 2.031×10 <sup>-7</sup> | (24) |
| AgNWs/ S1 and S2-Fc/RuNDs/GCE <sup>25</sup>                                                    | 6.838×10 <sup>-4</sup> | (25) |
| HKUST-1@rGO@Au/DNAzyme (S1)/CdS QDs/HRP <sup>26</sup>                                          | 2.072×10 <sup>-2</sup> | (26) |
| Fe <sub>3</sub> O <sub>4</sub> -Au-G4-QDs <sup>27</sup>                                        | 2.238×10 <sup>-3</sup> | (27) |

73

## 74 References

- 75 (1) Y. He; X. X. Hu; Z. J. Gong; S. H. Chen; R. Yuan, A novel electrochemiluminescence biosensor  
76 based on the self-ECL emission of conjugated polymer dots for lead ion detection. *Microchim. Acta*  
77 **2020**, *187* (4), 8.
- 78 (2) F. Ma; B. Sun; H. L. Qi; H. G. Zhang; Q. A. Gao; C. X. Zhang, A signal-on electrogenerated  
79 chemiluminescent biosensor for lead ion based on DNAzyme. *Anal. Chim. Acta* **2011**, *683* (2), 234-241.
- 80 (3) L. Zhu; X. Lv; Z. L. Li; H. H. Shi; Y. Zhang; L. N. Zhang; J. H. Yu, All-sealed paper-based

81 electrochemiluminescence platform for on-site determination of lead ions. *Biosens. Bioelectron.* **2021**,  
82 *192*, 7.

83 (4) T. T. Hao; C. F. Zhang; H. Lin; W. T. Wei; F. Yang; Y. B. Wu; L. M. Niu; W. J. Kang; Z. Y. Guo,  
84 A One-Step Dual-Mode Aptasensor for Subnanomolar Detection of Lead Ions Based on  
85 Electrochemiluminescence and Fast Scan Voltammetry. *J. Electrochem. Soc.* **2020**, *167* (12), 8.

86 (5) M. Li; Q. K. Kong; Z. Q. Bian; C. Ma; S. G. Ge; Y. Zhang; J. H. Yu; M. Yan, Ultrasensitive detection  
87 of lead ion sensor based on gold nanodendrites modified electrode and electrochemiluminescent  
88 quenching of quantum dots by electrocatalytic silver/zinc oxide coupled structures. *Biosens. Bioelectron.*  
89 **2015**, *65*, 176-182.

90 (6) Y. Z. Huang; L. Li; Y. Zhang; L. Zhang; S. G. Ge; H. Li; J. Yu, Cerium Dioxide-Mediated Signal  
91 "On-Off" by Resonance Energy Transfer on a Lab-On-Paper Device for Ultrasensitive Detection of Lead  
92 Ions. *ACS Appl. Mater. Interfaces* **2017**, *9* (38), 32591-32598.

93 (7) Y. Q. Dong; W. R. Tian; S. Y. Ren; R. P. Dai; Y. W. Chi; G. N. Chen, Graphene Quantum Dots/L-  
94 Cysteine Coreactant Electrochemiluminescence System and Its Application in Sensing Lead(II) Ions.  
95 *ACS Appl. Mater. Interfaces* **2014**, *6* (3), 1646-1651.

96 (8) J. M. Xu; Y. Zhang; L. Li; Q. K. Kong; L. Zhang; S. G. Ge; J. H. Yu, Colorimetric and  
97 Electrochemiluminescence Dual-Mode Sensing of Lead Ion Based on Integrated Lab-on-Paper Device.  
98 *ACS Appl. Mater. Interfaces* **2018**, *10* (4), 3431-3440.

99 (9) Y. M. Lei; W. X. Huang; M. Zhao; Y. Q. Chai; R. Yuan; Y. Zhuo, Electrochemiluminescence  
100 Resonance Energy Transfer System: Mechanism and Application in Ratiometric Aptasensor for Lead  
101 Ion. *Anal. Chem.* **2015**, *87* (15), 7787-7794.

102 (10) W. Deng; L. R. Hong; M. Zhao; Y. Zhuo; M. Gao, Electrochemiluminescence-based detection  
103 method of lead(II) ion dual enhancement of intermolecular and intramolecular co-reaction. *Analyst* **2015**,  
104 *140* (12), 4206-4211.

105 (11) X. M. Shan; T. Pan; Y. T. Pan; W. C. Wang; X. H. Chen; X. L. Shan; Z. D. Chen, Highly Sensitive  
106 and Selective Detection of Pb(II) by  $\text{NH}_2\text{-SiO}_2/\text{Ru}(\text{bpy})_3^{2+}\text{-UiO66}$  based Solid-state ECL Sensor.  
107 *Electroanalysis* **2020**, *32* (3), 462-469.

108 (12) A. Gao; C. X. Tang; X. W. He; X. B. Yin, Electrochemiluminescent lead biosensor based on GR-5  
109 lead-dependent DNazyme for  $\text{Ru}(\text{phen})_3^{2+}$  intercalation and lead recognition. *Analyst* **2013**, *138* (1),  
110 263-268.

111 (13) Q. A. Han; C. Wang; P. K. Liu; G. Zhang; L. Song; Y. Z. Fu, Three kinds of porphyrin dots as near-  
112 infrared electrochemiluminescence luminophores: Facile synthesis and biosensing. *Chem. Eng. J.* **2021**,  
113 *421*, 9.

114 (14) P. A. Jiang; L. J. Luo; X. H. Liu; W. L. Zhao; X. Y. Bi; L. Luo; L. B. Li; T. Y. You, A potential-  
115 resolved ratiometric electrochemiluminescence aptasensor for Pb<sup>2+</sup>: Gold nanoclusters and amino-  
116 terminated perylene derivative as both emitters and resonance energy transfer donor-acceptor pair. *Sens.*  
117 *Actuator B-Chem.* **2023**, *386*, 8.

118 (15) H. Hai; F. Yang; J. P. Li, Highly sensitive electrochemiluminescence "turn-on" aptamer sensor for  
119 lead(II) ion based on the formation of a G-quadruplex on a graphene and gold nanoparticles modified  
120 electrode. *Microchim. Acta* **2014**, *181* (9-10), 893-901.

121 (16) H. Y. Song; T. F. Kang; M. F. Jiang; J. J. Zhang; S. Y. Cheng, A novel strategy based on DNAzyme  
122 for electrochemiluminescence detection of Pb(II) with P-GO@QDs for signal amplification. *J.*  
123 *Electroanal. Chem.* **2017**, *801*, 244-250.

124 (17) H. G. Zhai; Y. Wang; J. Q. Yin; Y. H. Zhang; Q. Guo; X. Sun; Y. M. Guo; Q. Q. Yang; F. L. Li; Y.  
125 Y. Zhang, Electrochemiluminescence biosensor for determination of lead(II) ions using signal  
126 amplification by Au@SiO<sub>2</sub> and tripropylamine-endonuclease assisted cycling process. *Microchim. Acta*  
127 **2022**, *189* (9), 11.

128 (18) Y. Zhang; L. N. Zhang; Q. K. Kong; S. G. Ge; M. Yan; J. H. Yu, Electrochemiluminescence of  
129 graphitic carbon nitride and its application in ultrasensitive detection of lead(II) ions. *Anal. Bioanal.*  
130 *Chem.* **2016**, *408* (25), 7181-7191.

131 (19) M. Zhang; L. Ge; S. G. Ge; M. Yan; J. H. Yu; J. D. Huang; S. Liu, Three-dimensional paper-based  
132 electrochemiluminescence device for simultaneous detection of Pb<sup>2+</sup> and Hg<sup>2+</sup> based on potential-control  
133 technique. *Biosens. Bioelectron.* **2013**, *41*, 544-550.

134 (20) F. Sun; Z. Y. Wang; Y. Q. Feng; Y. X. Cheng; H. X. Ju; Y. W. Quan, Electrochemiluminescent  
135 resonance energy transfer of polymer dots for aptasensing. *Biosens. Bioelectron.* **2018**, *100*, 28-34.

136 (21) Y. J. Peng; Y. Li; L. L. Li; J. J. Zhu, A label-free aptasensor for ultrasensitive Pb<sup>2+</sup> detection based  
137 on electrochemiluminescence resonance energy transfer between carbon nitride nanofibers and  
138 Ru(phen)<sub>3</sub><sup>2+</sup>. *J. Hazard. Mater.* **2018**, *359*, 121-128.

139 (22) X. Zhu; Z. Y. Lin; L. F. Chen; B. Qiu; G. A. Chen, A sensitive and specific electrochemiluminescent  
140 sensor for lead based on DNAzyme. *Chem. Commun.* **2009**, (40), 6050-6052.

141 (23) Y. H. Wang; H. H. Shi; L. N. Zhang; S. G. Ge; M. L. Xu; X. Wang; J. H. Yu, Two-dimensional  
142 black phosphorus nanoflakes: A coreactant-free electrochemiluminescence luminophors for selective  
143  $Pb^{2+}$  detection based on resonance energy transfer. *J. Hazard. Mater.* **2021**, *403*, 9.

144 (24) X. L. Du; T. F. Kang; L. P. Lu; S. Y. Cheng, An electrochemiluminescence sensor based on  
145 CdSe@CdS functionalized  $MoS_2$  and hemin/G-quadruplex-based DNAzyme biocatalytic precipitation  
146 for sensitive detection of Pb(II). *Anal. Methods* **2018**, *10* (1), 51-58.

147 (25) H. J. Wang; Y. H. Song; Y. Q. Chai; R. Yuan, Highly sensitive biosensor based on target induced  
148 dual signal amplification to electrochemiluminescent nanoneedles of Ru(II) complex. *Biosens.*  
149 *Bioelectron.* **2019**, *140*, 64-68.

150 (26) Y. Zhang; J. M. Xu; S. Zhou; L. Zhu; X. Lv; J. Zhang; L. N. Zhang; P. H. Zhu; J. H. Yu, DNAzyme-  
151 Triggered Visual and Ratiometric Electrochemiluminescence Dual-Readout Assay for Pb(II) Based on  
152 an Assembled Paper Device. *Anal. Chem.* **2020**, *92* (5), 3874-3881.

153 (27) H. Hai; F. Yang; J. P. Li, Electrochemiluminescence sensor using quantum dots based on a G-  
154 quadruplex aptamer for the detection of  $Pb^{2+}$ . *RSC Adv.* **2013**, *3* (32), 13144-13148.

155
